# Supplementary material
Source: Research Square preprint supplement (doi:10.21203/rs.3.rs-9860438/v1)

# Arsenic Standard Curve: AAS

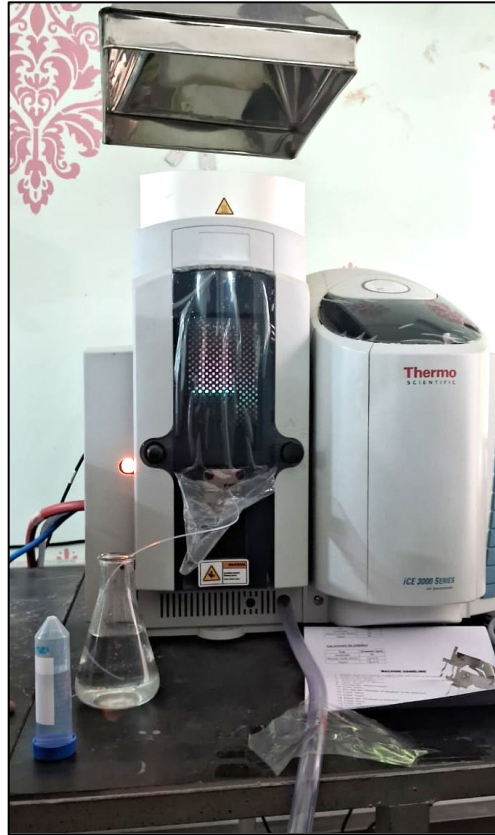

**Thermo**  
SCIENTIFIC

Instrument Details: Thermo SCIENTIFIC  
Report Date: 15.01.2025  
Spectrophotometer: ICE 3000 AA01233004V1.30

$Y = 0.0061x + 0.002$   
Fit: 0.9924  
Characteristics conc: 0.3368

| Sample ID     | Signal Abs | Conc Mg/L |
|---------------|------------|-----------|
| As blank      | 0          | 0.0000    |
| As Standard 1 | 0.007      | 1.0000    |
| As standard 2 | 0.016      | 2.0000    |
| As Standard 3 | 0.035      | 5.0000    |
| As Standard 4 | 0.061      | 10.0000   |

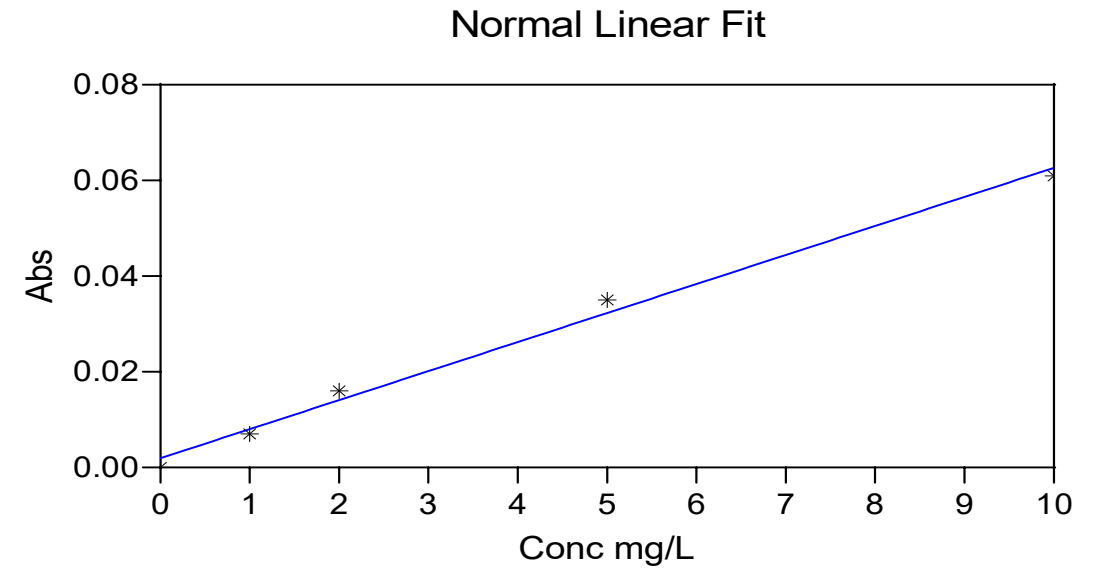

Supplement: Supplementary file 1 [file Arsenic AAS Standard Curve.pdf › Arsenic AAS Standard Curve.pdf]
