# Supplementary material
Source: Research Square preprint supplement (doi:10.21203/rs.3.rs-9860438/v1)
Supplement: Supplementary file 2 [file 16eddbde3bb1dd8913704e70.docx]

**Supplementary Table 1:** Observations of the antibiotic test.

| **Antibiotic** | **Strain** | **Diameter** | **Antibiotic concentration (mg/L)** | | |
| --- | --- | --- | --- | --- | --- |
| **10** | **100** | **1000** |
| Kanamycin | C2 | Length (cm) | 0 | 0 | 0.4 |
| Diameter (cm) | 0 | 0 | 0.3 |
| C4 | Length (cm) | 0 | 0 | 0.5 |
| Diameter (cm) | 0 | 0 | 0.4 |
| C5 | Length (cm) | 0 | 0 | 0.4 |
| Diameter (cm) | 0 | 0 | 0.4 |
| Ampicillin | C2 | Length (cm) | 0 | 0 | 1.7 |
| Diameter (cm) | 0 | 0 | 0.4 |
| C4 | Length (cm) | 0 | 0 | 1.6 |
| Diameter (cm) | 0 | 0 | 0.5 |
| C5 | Length (cm) | 0 | 0 | 0.4 |
| Diameter (cm) | 0 | 0 | 0.3 |
| Ciprofloxacin | C2 | Length (cm) | 2.0 | 1.7 | 4.0 |
| Diameter (cm) | 1.5 | 2.5 | 3.4 |
| C4 | Length (cm) | 0.5 | 2.4 | 3.5 |
| Diameter (cm) | 0.2 | 2.4 | 3.6 |
| C5 | Length (cm) | 1.5 | 2.5 | 3.5 |
| Diameter (cm) | 1.0 | 2.0 | 5.5 |
| Azithromycin | C2 | Length (cm) | 0 | 0.8 | 1.4 |
| Diameter (cm) | 0 | 1.0 | 1.2 |
| C4 | Length (cm) | 0 | 0.1 | 1.0 |
| Diameter (cm) | 0 | 0.1 | 0.5 |
| C5 | Length (cm) | 0 | 0 | 1.4 |
| Diameter (cm) | 0 | 0 | 0.3 |
