# Supplementary material
Source: Research Square preprint supplement (doi:10.21203/rs.3.rs-9860438/v1)
Supplement: Supplementary file 3 [file AS (V) C2C4 200.pdf › FTIR-System generated PDF files of Consortia/AS (V) C2C4 200.pdf]

Analyst  
Date

Administrator  
01 October 2024 12:51

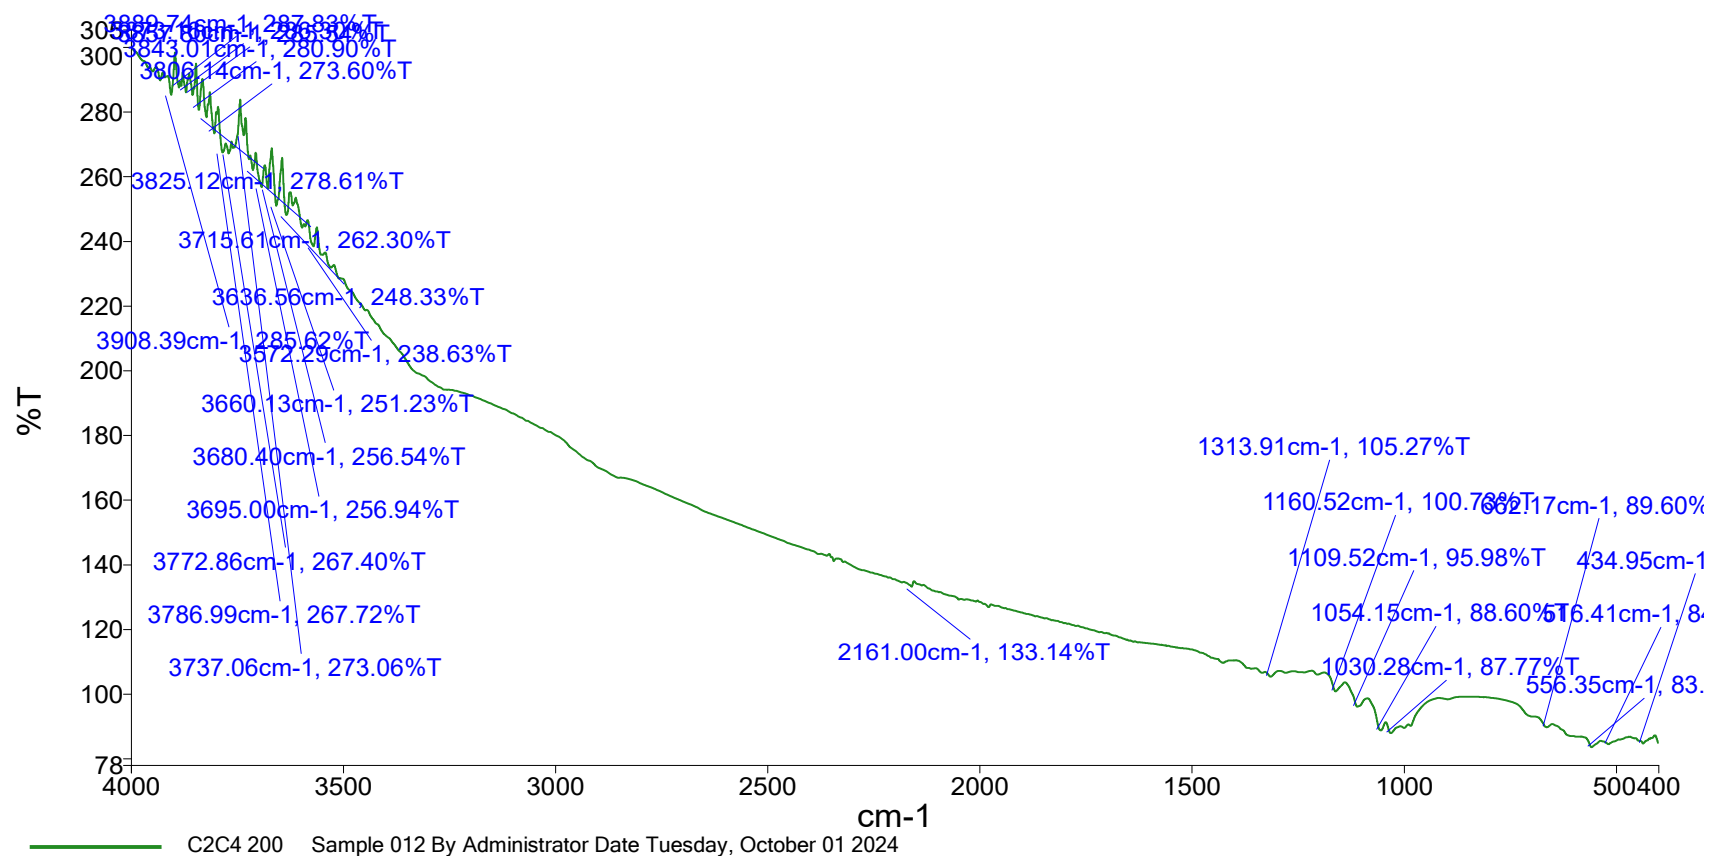

| Source Spectra Results |                 |
|------------------------|-----------------|
| Spectrum Name          | Number Of Peaks |
| C2C4 200               | 26              |

| List of Peak Area/Height |          |        |
|--------------------------|----------|--------|
| Peak Number              | X (cm-1) | Y (%T) |
| 1                        | 3908.39  | 285.62 |
| 2                        | 3889.74  | 287.83 |
| 3                        | 3873.16  | 286.30 |
| 4                        | 3857.80  | 285.54 |
| 5                        | 3843.01  | 280.90 |
| 6                        | 3825.12  | 278.61 |
| 7                        | 3806.14  | 273.60 |
| 8                        | 3786.99  | 267.72 |
| 9                        | 3772.86  | 267.40 |
| 10                       | 3737.06  | 273.06 |
| 11                       | 3715.61  | 262.30 |
| 12                       | 3695.00  | 256.94 |
| 13                       | 3680.40  | 256.54 |
| 14                       | 3660.13  | 251.23 |
| 15                       | 3636.56  | 248.33 |
| 16                       | 3572.29  | 238.63 |
| 17                       | 2161.00  | 133.14 |
| 18                       | 1313.91  | 105.27 |
| 19                       | 1160.52  | 100.73 |
| 20                       | 1109.52  | 95.98  |
| 21                       | 1054.15  | 88.60  |
| 22                       | 1030.28  | 87.77  |
| 23                       | 662.17   | 89.60  |
| 24                       | 556.35   | 83.42  |
| 25                       | 516.41   | 84.33  |
| 26                       | 434.95   | 84.54  |
