# Supplementary material
Source: Research Square preprint supplement (doi:10.21203/rs.3.rs-9860438/v1)
Supplement: Supplementary file 4 [file AS (V)C2C5 200.pdf › FTIR-System generated PDF files of Consortia/AS (V)C2C5 200.pdf]

Analyst  
Date

Administrator  
01 October 2024 12:40

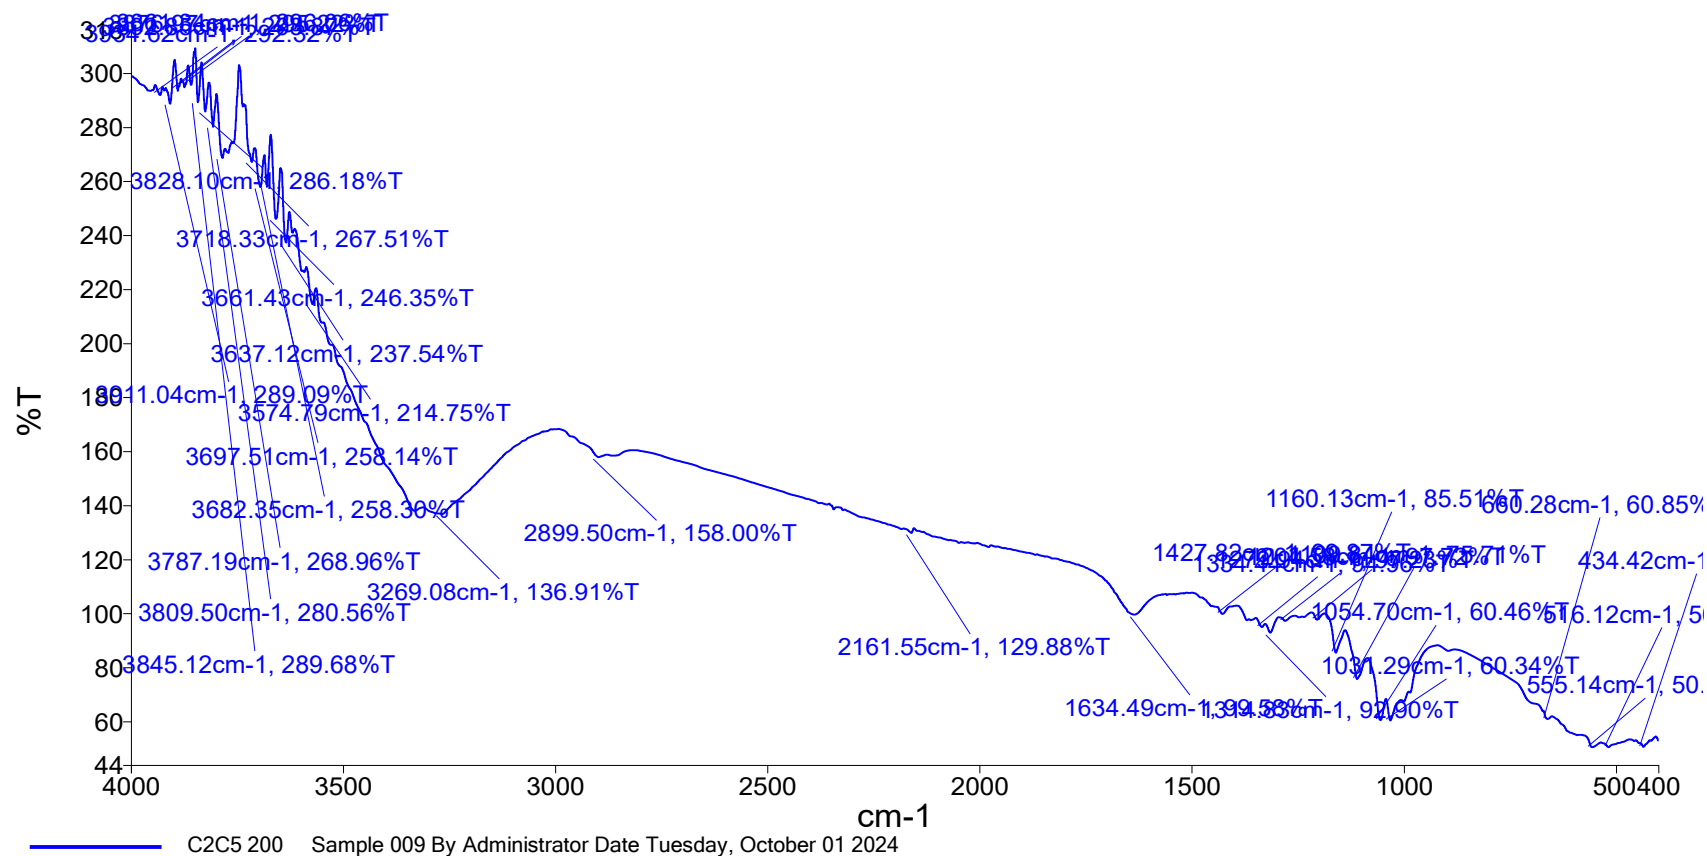

| Source Spectra Results |                 |
|------------------------|-----------------|
| Spectrum Name          | Number Of Peaks |
| C2C5 200               | 32              |

| List of Peak Area/Height |          |        |
|--------------------------|----------|--------|
| Peak Number              | X (cm-1) | Y (%T) |
| 1                        | 3934.62  | 292.32 |
| 2                        | 3911.04  | 289.09 |
| 3                        | 3892.85  | 293.87 |
| 4                        | 3876.97  | 295.22 |
| 5                        | 3861.34  | 296.06 |
| 6                        | 3845.12  | 289.68 |
| 7                        | 3828.10  | 286.18 |
| 8                        | 3809.50  | 280.56 |
| 9                        | 3787.19  | 268.96 |
| 10                       | 3718.33  | 267.51 |
| 11                       | 3697.51  | 258.14 |
| 12                       | 3682.35  | 258.30 |
| 13                       | 3661.43  | 246.35 |
| 14                       | 3637.12  | 237.54 |
| 15                       | 3574.79  | 214.75 |
| 16                       | 3269.08  | 136.91 |
| 17                       | 2899.50  | 158.00 |
| 18                       | 2161.55  | 129.88 |
| 19                       | 1634.49  | 99.58  |
| 20                       | 1427.82  | 99.87  |
| 21                       | 1334.44  | 94.96  |
| 22                       | 1314.83  | 92.90  |
| 23                       | 1279.94  | 97.23  |
| 24                       | 1204.58  | 97.72  |
| 25                       | 1160.13  | 85.51  |
| 26                       | 1109.84  | 75.71  |
| 27                       | 1054.70  | 60.46  |
| 28                       | 1031.29  | 60.34  |
| 29                       | 660.28   | 60.85  |

| List of Peak Area/Height |          |        |
|--------------------------|----------|--------|
| Peak Number              | X (cm-1) | Y (%T) |
| 30                       | 555.14   | 50.40  |
| 31                       | 516.12   | 50.44  |
| 32                       | 434.42   | 50.51  |
