# Supplementary material
Source: Research Square preprint supplement (doi:10.21203/rs.3.rs-9860438/v1)
Supplement: Supplementary file 5 [file AS (V)C4C5 200.pdf › FTIR-System generated PDF files of Consortia/AS (V)C4C5 200.pdf]

Analyst  
Date

Administrator  
01 October 2024 12:46

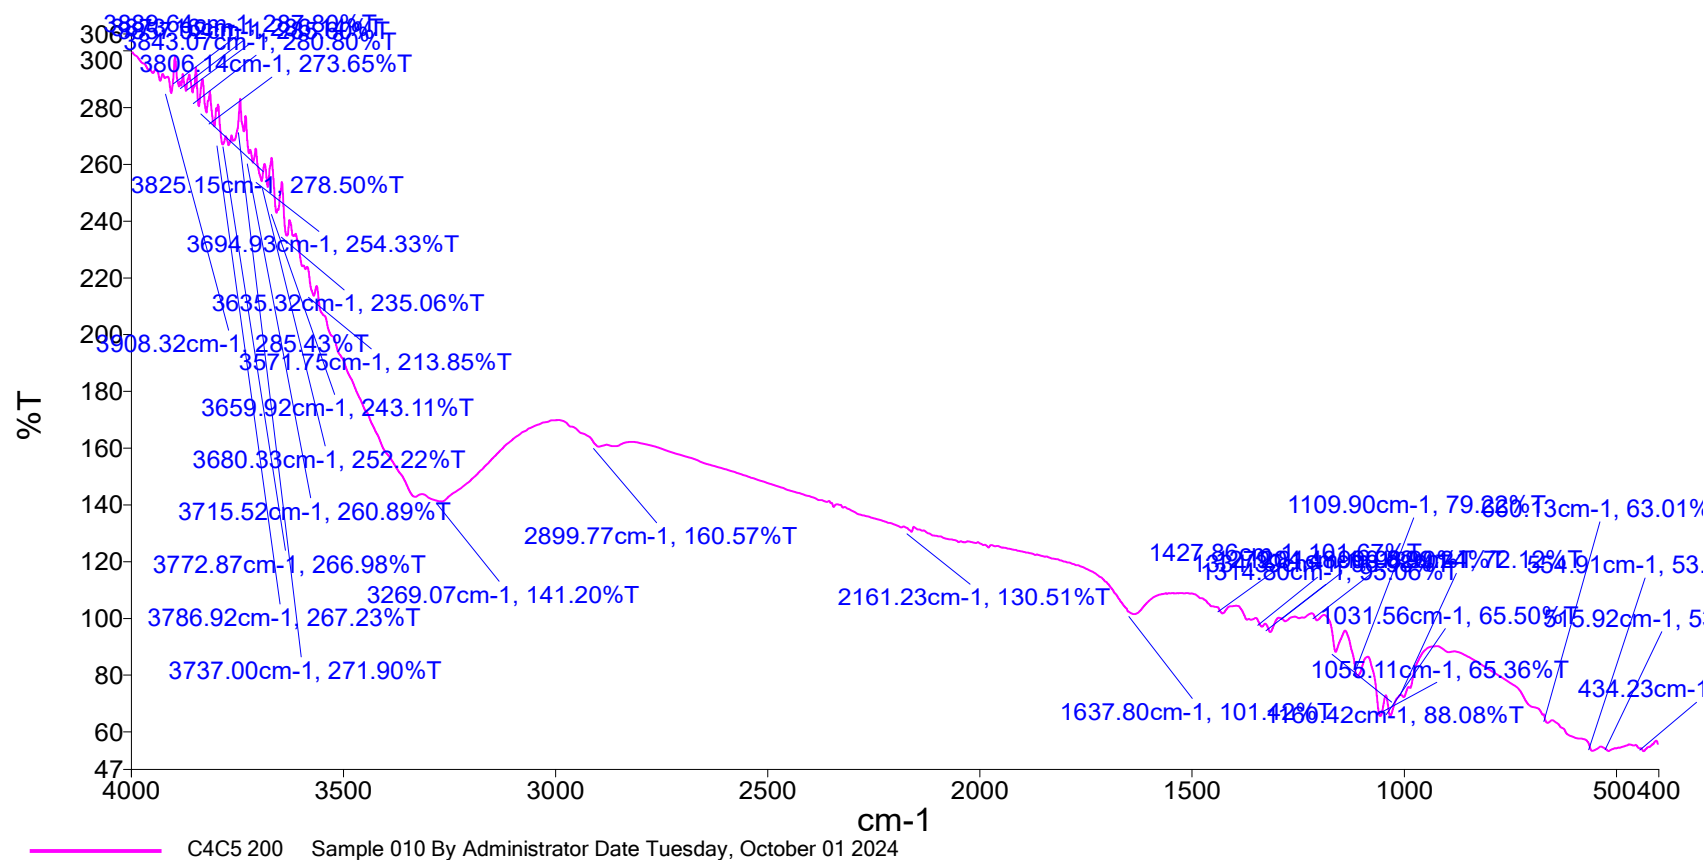

| Source Spectra Results |                 |
|------------------------|-----------------|
| Spectrum Name          | Number Of Peaks |
| C4C5 200               | 34              |

| List of Peak Area/Height |          |        |
|--------------------------|----------|--------|
| Peak Number              | X (cm-1) | Y (%T) |
| 1                        | 3908.32  | 285.43 |
| 2                        | 3889.64  | 287.80 |
| 3                        | 3873.16  | 286.14 |
| 4                        | 3857.92  | 285.60 |
| 5                        | 3843.07  | 280.80 |
| 6                        | 3825.15  | 278.50 |
| 7                        | 3806.14  | 273.65 |
| 8                        | 3786.92  | 267.23 |
| 9                        | 3772.87  | 266.98 |
| 10                       | 3737.00  | 271.90 |
| 11                       | 3715.52  | 260.89 |
| 12                       | 3694.93  | 254.33 |
| 13                       | 3680.33  | 252.22 |
| 14                       | 3659.92  | 243.11 |
| 15                       | 3635.32  | 235.06 |
| 16                       | 3571.75  | 213.85 |
| 17                       | 3269.07  | 141.20 |
| 18                       | 2899.77  | 160.57 |
| 19                       | 2161.23  | 130.51 |
| 20                       | 1637.80  | 101.42 |
| 21                       | 1427.86  | 101.67 |
| 22                       | 1334.39  | 96.98  |
| 23                       | 1314.80  | 95.06  |
| 24                       | 1279.81  | 98.90  |
| 25                       | 1204.48  | 99.24  |
| 26                       | 1160.42  | 88.08  |
| 27                       | 1109.90  | 79.22  |
| 28                       | 1055.11  | 65.36  |
| 29                       | 1031.56  | 65.50  |
| 30                       | 999.82   | 72.12  |
| 31                       | 660.13   | 63.01  |

| List of Peak Area/Height |          |        |
|--------------------------|----------|--------|
| Peak Number              | X (cm-1) | Y (%T) |
| 32                       | 554.91   | 53.12  |
| 33                       | 515.92   | 53.07  |
| 34                       | 434.23   | 53.01  |
