# Supplementary material
Source: Research Square preprint supplement (doi:10.21203/rs.3.rs-9860438/v1)
Supplement: Supplementary file 6 [file As (III)5 C2C4.pdf › FTIR-System generated PDF files of Consortia/As (III)5 C2C4.pdf]

Analyst  
Date

Administrator  
18 December 2024 12:54

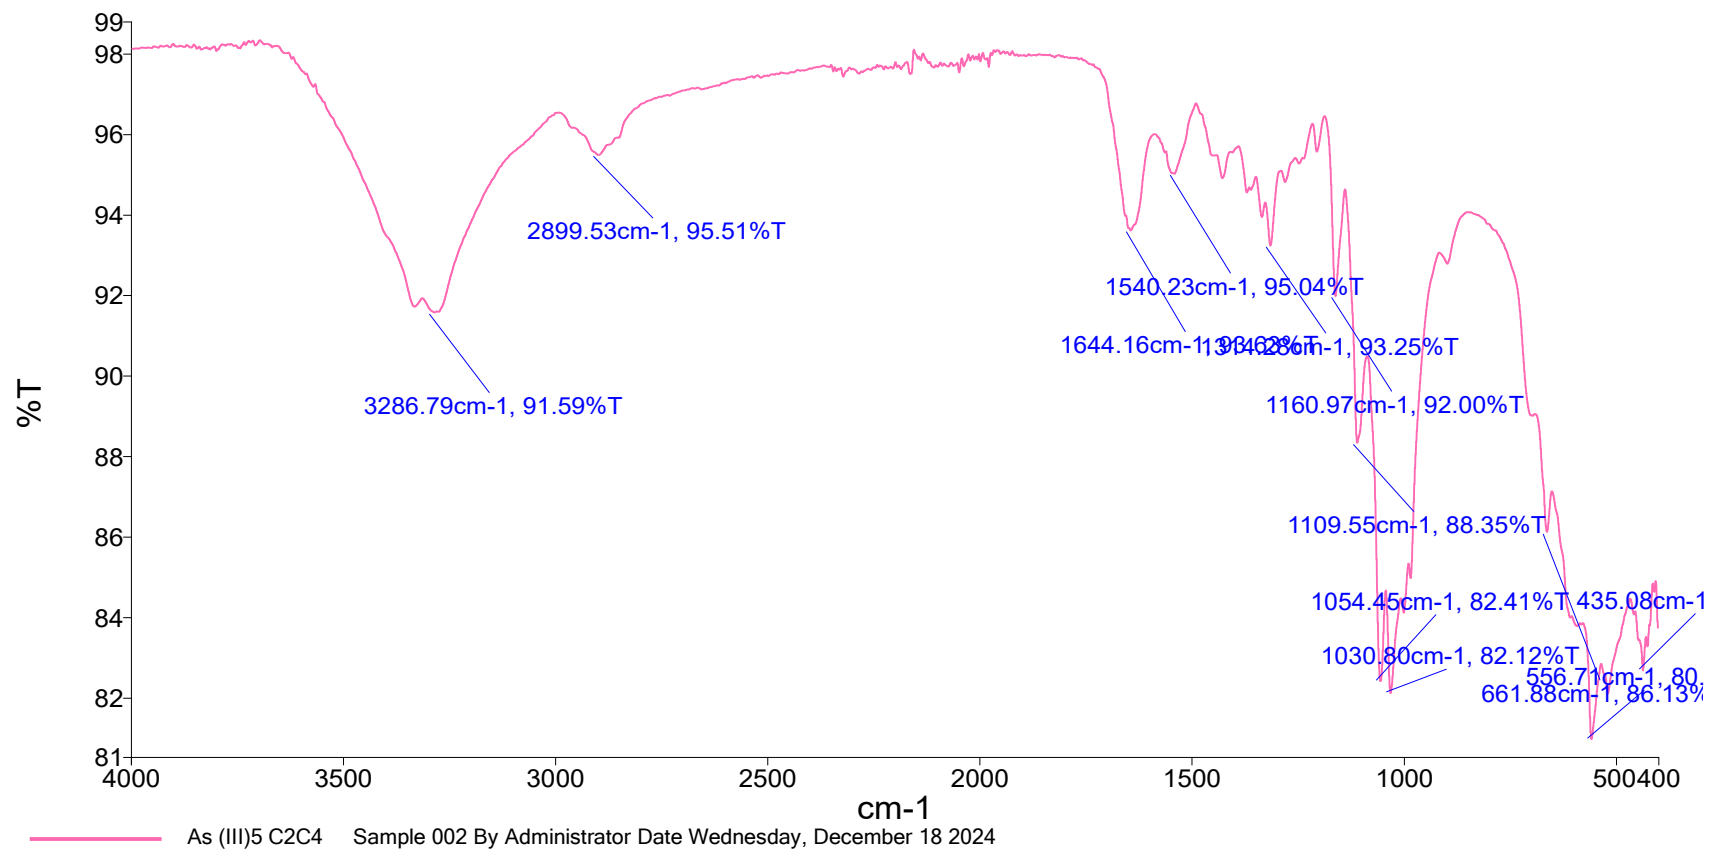

| Source Spectra Results |                 |
|------------------------|-----------------|
| Spectrum Name          | Number Of Peaks |
| As (III)5 C2C4         | 12              |

| List of Peak Area/Height |          |        |
|--------------------------|----------|--------|
| Peak Number              | X (cm-1) | Y (%T) |
| 1                        | 3286.79  | 91.59  |
| 2                        | 2899.53  | 95.51  |
| 3                        | 1644.16  | 93.63  |
| 4                        | 1540.23  | 95.04  |
| 5                        | 1314.28  | 93.25  |
| 6                        | 1160.97  | 92.00  |
| 7                        | 1109.55  | 88.35  |
| 8                        | 1054.45  | 82.41  |
| 9                        | 1030.80  | 82.12  |
| 10                       | 661.88   | 86.13  |
| 11                       | 556.71   | 80.97  |
| 12                       | 435.08   | 82.68  |
