# Supplementary material
Source: Research Square preprint supplement (doi:10.21203/rs.3.rs-9860438/v1)
Supplement: Supplementary file 7 [file As (III)5 C2C5.pdf › FTIR-System generated PDF files of Consortia/As (III)5 C2C5.pdf]

Analyst  
Date

Administrator  
18 December 2024 12:29

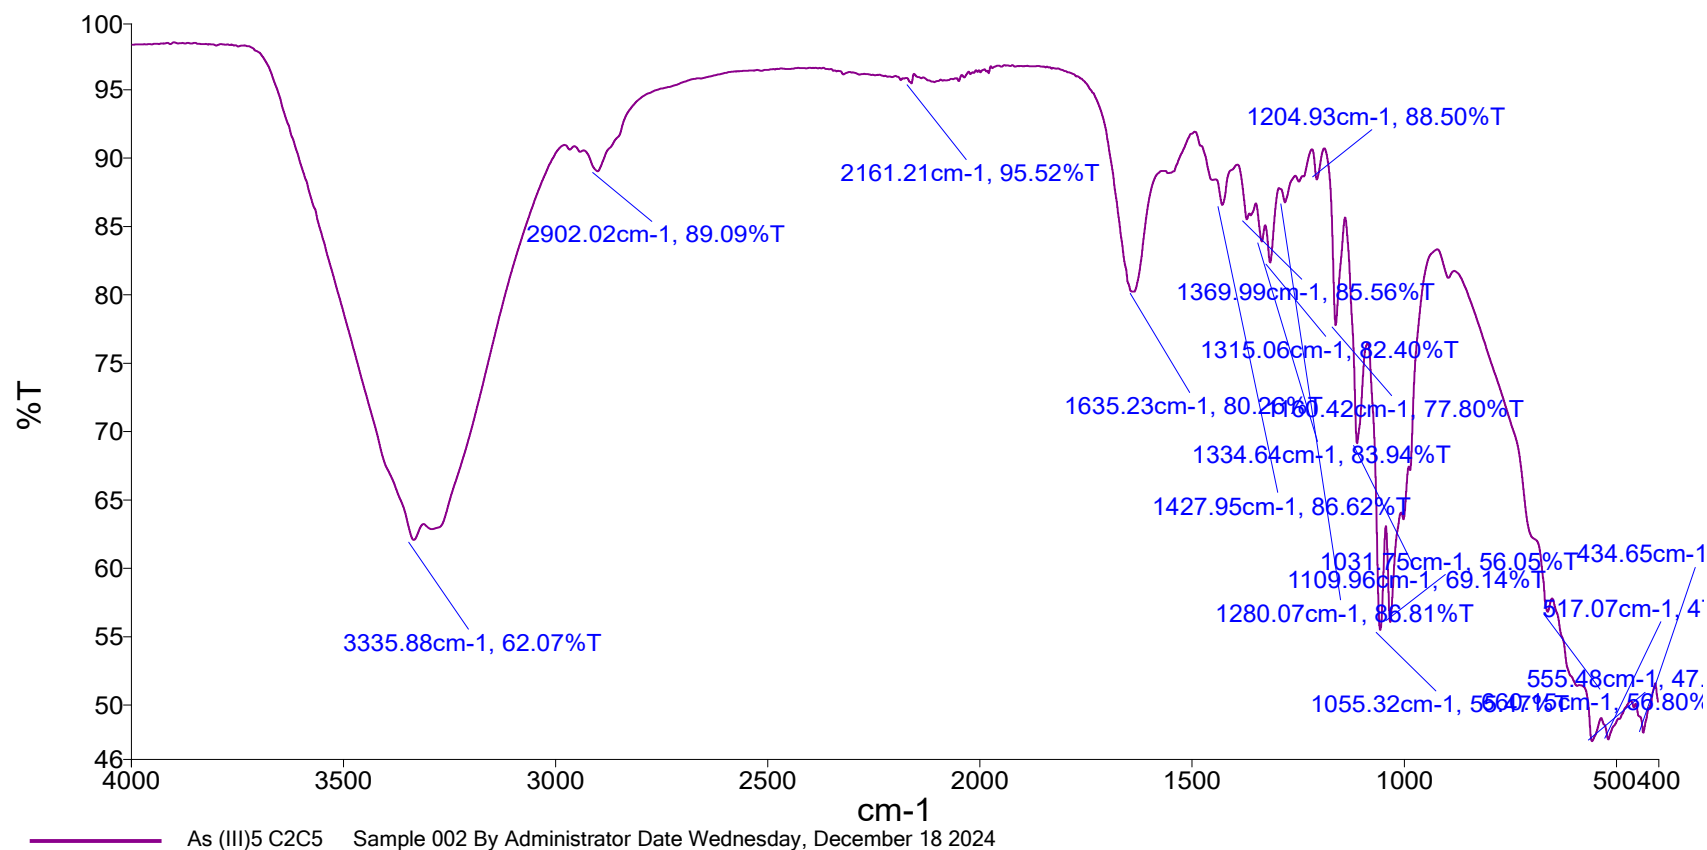

| Source Spectra Results |                 |
|------------------------|-----------------|
| Spectrum Name          | Number Of Peaks |
| As (III)5 C2C5         | 18              |

| List of Peak Area/Height |          |        |
|--------------------------|----------|--------|
| Peak Number              | X (cm-1) | Y (%T) |
| 1                        | 3335.88  | 62.07  |
| 2                        | 2902.02  | 89.09  |
| 3                        | 2161.21  | 95.52  |
| 4                        | 1635.23  | 80.26  |
| 5                        | 1427.95  | 86.62  |
| 6                        | 1369.99  | 85.56  |
| 7                        | 1334.64  | 83.94  |
| 8                        | 1315.06  | 82.40  |
| 9                        | 1280.07  | 86.81  |
| 10                       | 1204.93  | 88.50  |
| 11                       | 1160.42  | 77.80  |
| 12                       | 1109.96  | 69.14  |
| 13                       | 1055.32  | 55.47  |
| 14                       | 1031.75  | 56.05  |
| 15                       | 660.15   | 56.80  |
| 16                       | 555.48   | 47.31  |
| 17                       | 517.07   | 47.45  |
| 18                       | 434.65   | 47.92  |
