# Supplementary material
Source: Research Square preprint supplement (doi:10.21203/rs.3.rs-9860438/v1)
Supplement: Supplementary file 8 [file As (III)5 C4C5.pdf › FTIR-System generated PDF files of Consortia/As (III)5 C4C5.pdf]

Analyst  
Date

Administrator  
18 December 2024 12:15

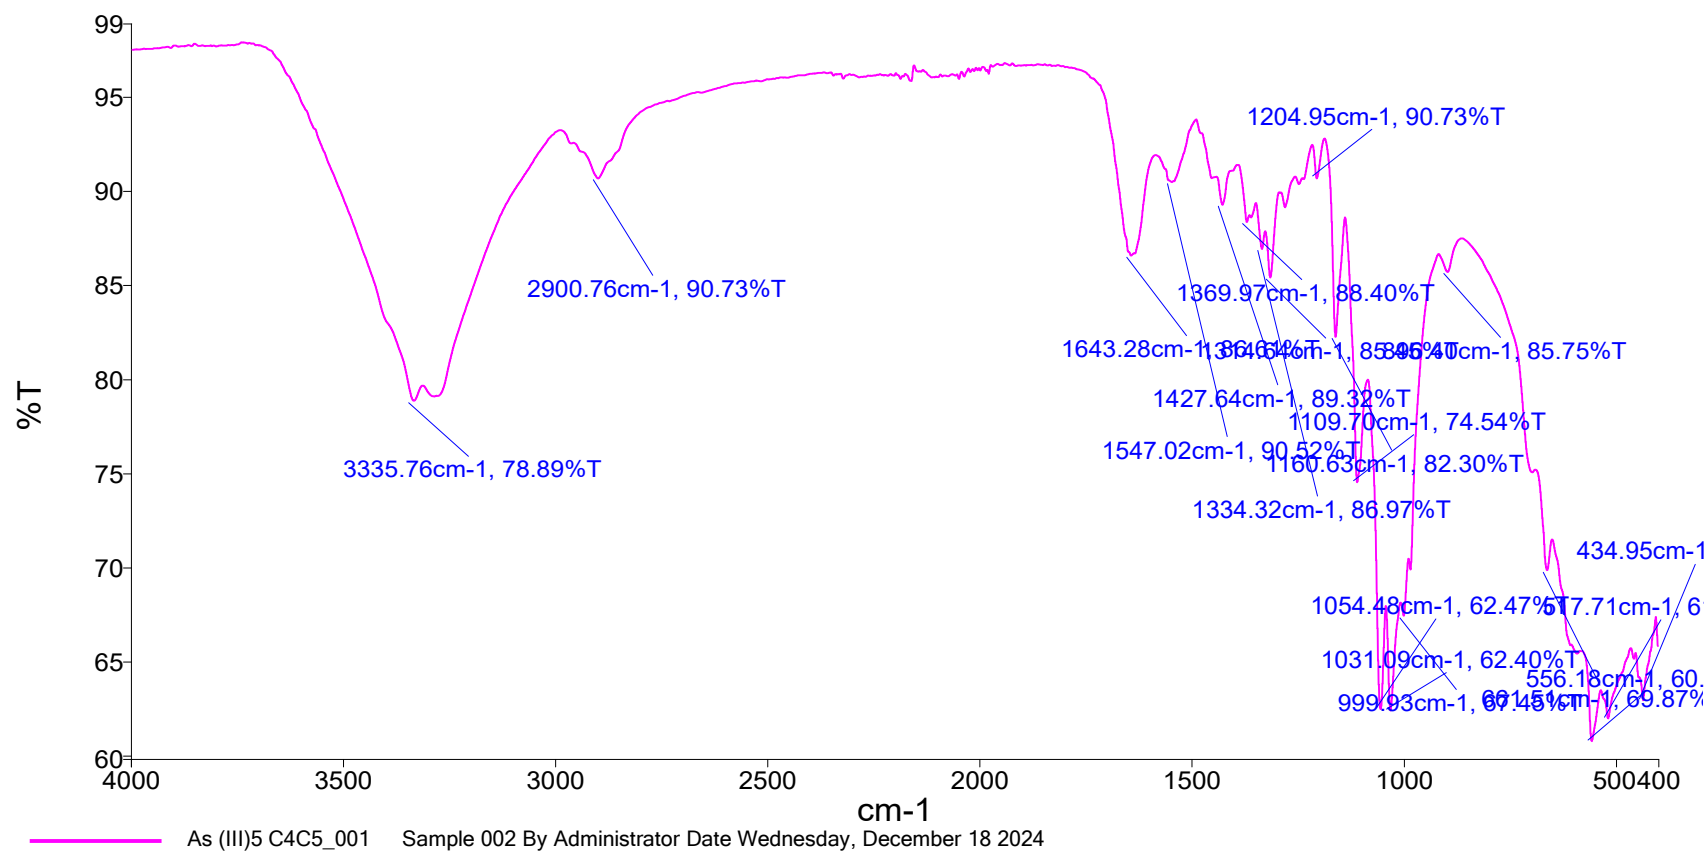

| Source Spectra Results |                 |
|------------------------|-----------------|
| Spectrum Name          | Number Of Peaks |
| As (III)5 C4C5_001     | 19              |

| List of Peak Area/Height |          |        |
|--------------------------|----------|--------|
| Peak Number              | X (cm-1) | Y (%T) |
| 1                        | 3335.76  | 78.89  |
| 2                        | 2900.76  | 90.73  |
| 3                        | 1643.28  | 86.61  |
| 4                        | 1547.02  | 90.52  |
| 5                        | 1427.64  | 89.32  |
| 6                        | 1369.97  | 88.40  |
| 7                        | 1334.32  | 86.97  |
| 8                        | 1314.64  | 85.45  |
| 9                        | 1204.95  | 90.73  |
| 10                       | 1160.63  | 82.30  |
| 11                       | 1109.70  | 74.54  |
| 12                       | 1054.48  | 62.47  |
| 13                       | 1031.09  | 62.40  |
| 14                       | 999.93   | 67.45  |
| 15                       | 896.40   | 85.75  |
| 16                       | 661.51   | 69.87  |
| 17                       | 556.18   | 60.76  |
| 18                       | 517.71   | 61.98  |
| 19                       | 434.95   | 62.95  |
