# Supplementary material
Source: Research Square preprint supplement (doi:10.21203/rs.3.rs-9860438/v1)
Supplement: Supplementary file 9 [file 16S RNA amplification data.pdf › 16S RNA amplification data.pdf]

### Amplification QC\_0624\_893

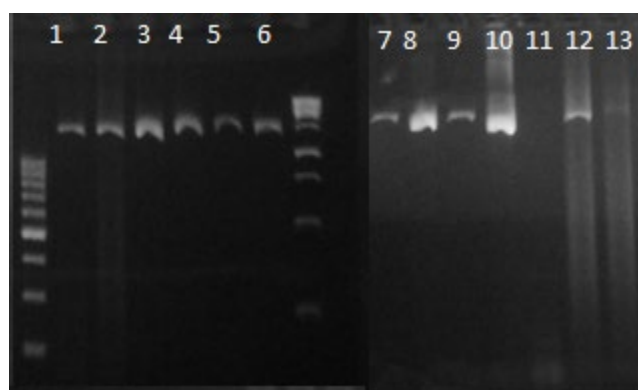

| SL.NO      | Order no. | Well no. | Sample name |                          |
|------------|-----------|----------|-------------|--------------------------|
| 100bp      |           |          |             |                          |
| 1          | 0624_893  | 1        | 1           | QC pass                  |
| 2          | 0624_893  | 2        | 2           | QC pass                  |
| 3          | 0624_893  | 3        | 3           | QC pass                  |
| 4          | 0624_893  | 4        | 4           | QC pass                  |
| 5          | 0624_893  | 5        | 5           | QC pass                  |
| 6          | 0624_893  | 6        | 6           | QC pass                  |
| 1KB ladder |           |          |             |                          |
| 7          | 0624_893  | 7        | 7           | QC pass                  |
| 8          | 0624_893  | 8        | 8           | QC pass                  |
| 9          | 0624_893  | 9        | C2          | QC pass                  |
| 10         | 0624_893  | 10       | S4          | QC pass                  |
| 11         | 0624_893  | 11       | S5          | QC failed                |
| 12         | 0624_893  | 12       | S2          | QC pass smear observed   |
| 13         | 0624_893  | 13       | C5          | Faint and smear observed |

### 100bp ladder specification

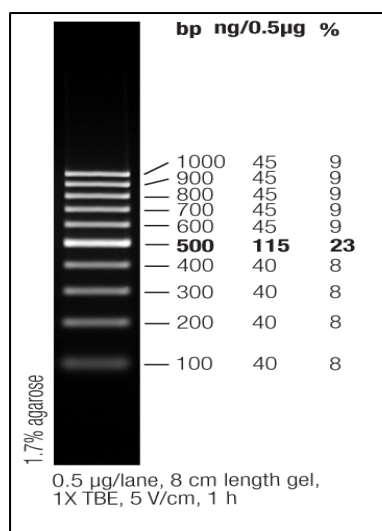

### Primers used:

|       |                      |
|-------|----------------------|
| 27F   | AGAGTTTGATCCTGGCTCAG |
| 1492R | CGGTTACCTTGTTACGACTT |
