# Supplementary material
Source: Research Square preprint supplement (doi:10.21203/rs.3.rs-9860438/v1)
Supplement: Supplementary file 10 [file Amplification QC 0624_893.pdf › Amplification QC 0624_893.pdf]

## Amplification QC \_0624\_893

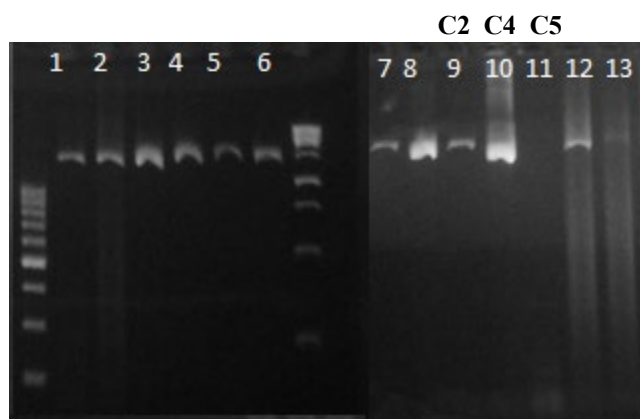

| SL.NO             | Order no. | Well no. | Sample name |                          |
|-------------------|-----------|----------|-------------|--------------------------|
| <b>100bp</b>      |           |          |             |                          |
| 1                 | 0624_893  | 1        | 1           | QC pass                  |
| 2                 | 0624_893  | 2        | 2           | QC pass                  |
| 3                 | 0624_893  | 3        | 3           | QC pass                  |
| 4                 | 0624_893  | 4        | 4           | QC pass                  |
| 5                 | 0624_893  | 5        | 5           | QC pass                  |
| 6                 | 0624_893  | 6        | 6           | QC pass                  |
| <b>1KB ladder</b> |           |          |             |                          |
| 7                 | 0624_893  | 7        | 7           | QC pass                  |
| 8                 | 0624_893  | 8        | 8           | QC pass                  |
| 9                 | 0624_893  | 9        | C2          | QC pass                  |
| 10                | 0624_893  | 10       | C4          | QC pass                  |
| 11                | 0624_893  | 11       | C5          | QC failed                |
| 12                | 0624_893  | 12       | C2          | QC pass smear observed   |
| 13                | 0624_893  | 13       | C5          | Faint and smear observed |

### 100bp ladder specification

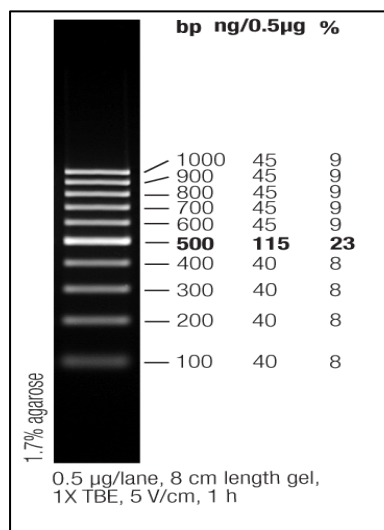

### Primers used:

|       |                      |
|-------|----------------------|
| 27F   | AGAGTTTGATCCTGGCTCAG |
| 1492R | CGGTTACCTTGTTACGACTT |
